# Supplementary material for: Assessing acetone for the GISS ModelE2.1 Earth system model
Source: Copernicus journal article supplement (doi:10.5194/gmd-17-3487-2024), 2024-05-02
Supplement: Supplementary file 1 [file gmd-17-3487-2024-supplement.pdf]

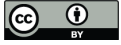

*Supplement of*

## **Assessing acetone for the GISS ModelE2.1 Earth system model**

**Alexandra Rivera et al.**

*Correspondence to:* Kostas Tsigaridis ([kostas.tsigaridis@columbia.edu](mailto:kostas.tsigaridis@columbia.edu))

The copyright of individual parts of the supplement might differ from the article licence.

## 1 Chemical sources

2 The acetone molar yields of propane, butane, pentane, and higher alkanes were derived with suggestions from the literature  
3 (Fischbeck et al., 2017; Jacob et al., 2002; Weimer et al., 2017). We used a molar yield of 0.73 for propane, derived by averaging  
4 0.72 from Jacob et al. (2002) and 0.736 from Weimer et al. (2017). Our molar yield of 0.95 for butane was derived by averaging  
5 0.96 from Fischbeck et al. (2017) and 0.93 from Jacob et al. (2002). Our molar yield of 0.63 for pentane was derived by  
6 averaging 0.72 from Fischbeck et al. (2017) and 0.53 from Jacob et al. (2002). Finally, we used a molar yield of 0.79 for higher  
7 alkanes, derived from averaging the following four values: 0.96 for isobutane and 0.72 for isopentane in Fischbeck et al. (2017),  
8 and 0.93 for isobutane and 0.53 for isopentane in Jacob et al. (2002).

## 9 Global acetone budget and burden

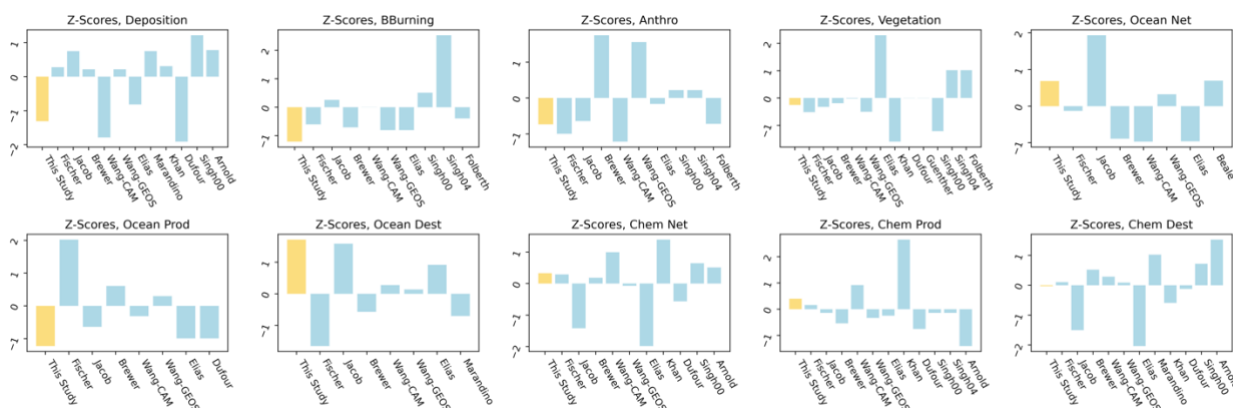

10

11 **Figure S1.** The data recorded in the literature was used to determine a mean for each budget flux value, and the distance from  
12 that mean for each paper was expressed as a z-score (Arnold et al., 2005; Beale et al., 2013; Brewer et al., 2017; Dufour et al.,  
13 2016; Elias et al., 2011; Fischer et al., 2012; Folberth et al., 2006; Guenther et al., 2012; Jacob et al., 2002; Khan et al., 2015;  
14 Marandino et al., 2006; Singh et al., 2000, 2004; Wang et al., 2020). The z-scores for the literature are shown as light-blue  
15 bars, and the Baseline model's z-score is highlighted in yellow.

16

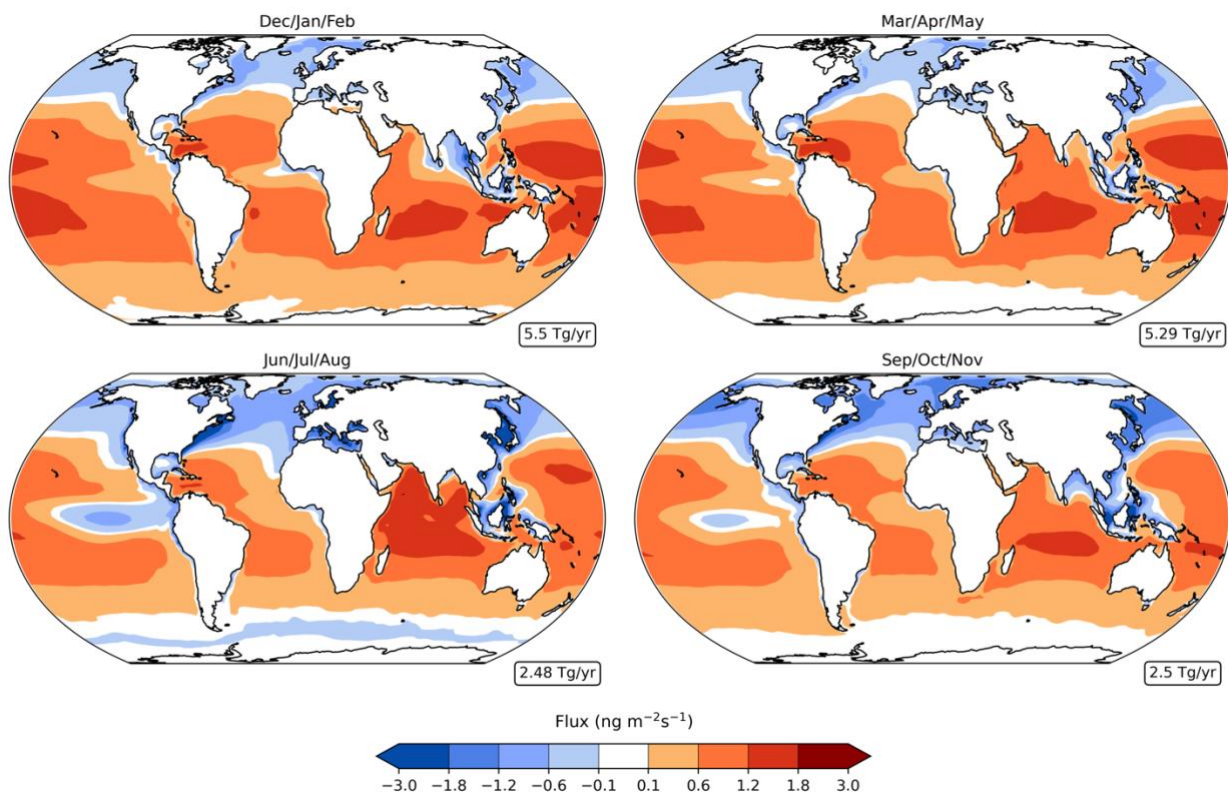

18  
 19 **Figure S2.** Net oceanic acetone fluxes in the Baseline simulation for December-February (top left), March-May (top right), June-  
 20 August (bottom left), and September-November (bottom right), with red indicating a net source and blue indicating a net sink.  
 21 Nonlinear colorbars are used to better differentiate the details in the map. The weighted global means of the net ocean fluxes are  
 22 shown in boxes on the lower right of each subplot.

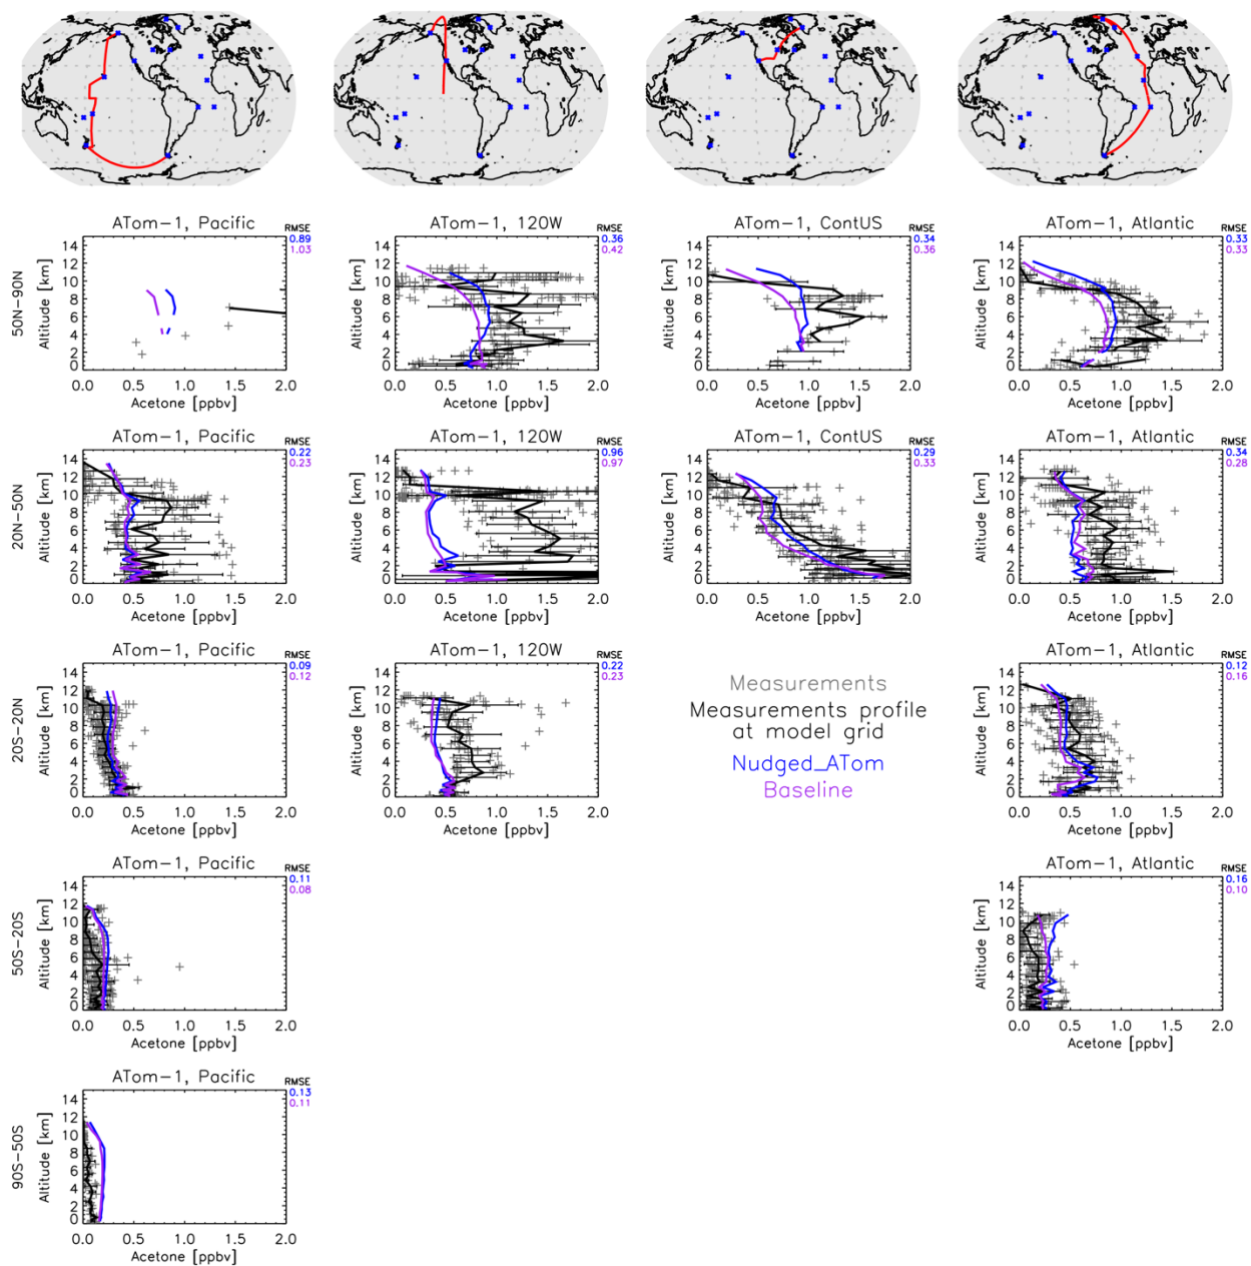

25

26 **Figure S3.** Comparison between the GISS ModelE2.1 simulations (Baseline in purple and Nudged\_ATOM in blue) and the  
 27 ATom-1 field measurements (July-August 2016). Individual data points are shown with dark grey symbols, and their average  
 28 values are shown in black, with error bars representing the one-sigma range of the averages. The root mean square error (RMSE)  
 29 of each simulation is noted at the top right of each subplot.

30

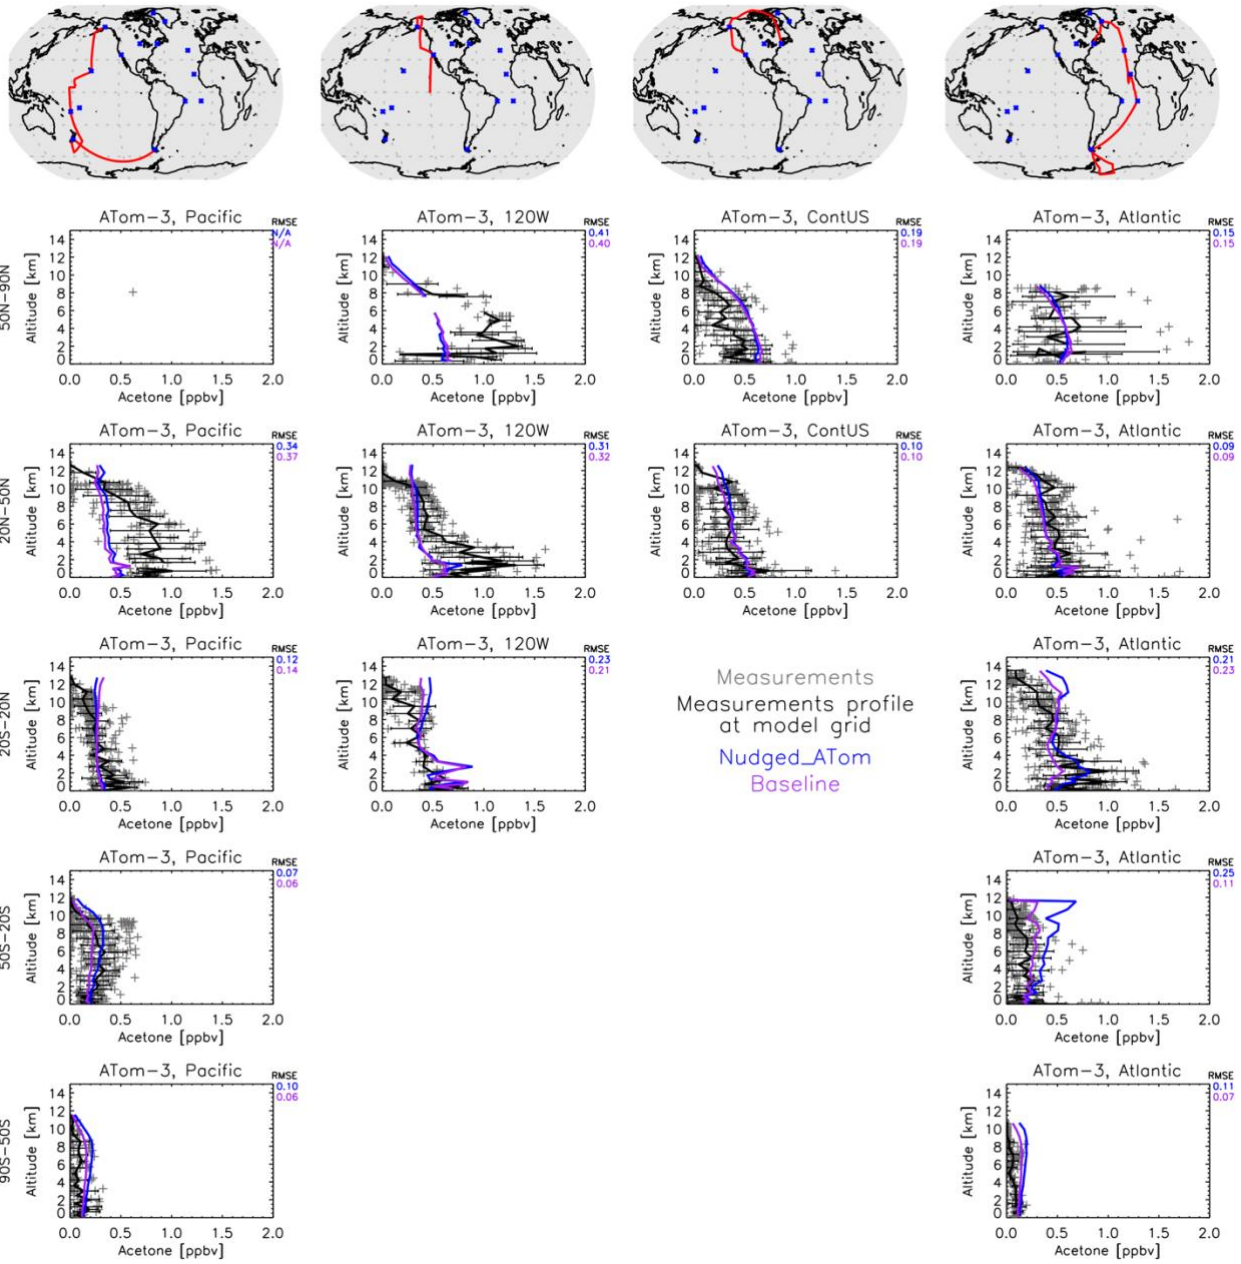

31

32 **Figure S4.** Similar to Figure S3, except for the ATom-3 field measurements (September-October 2017).

33

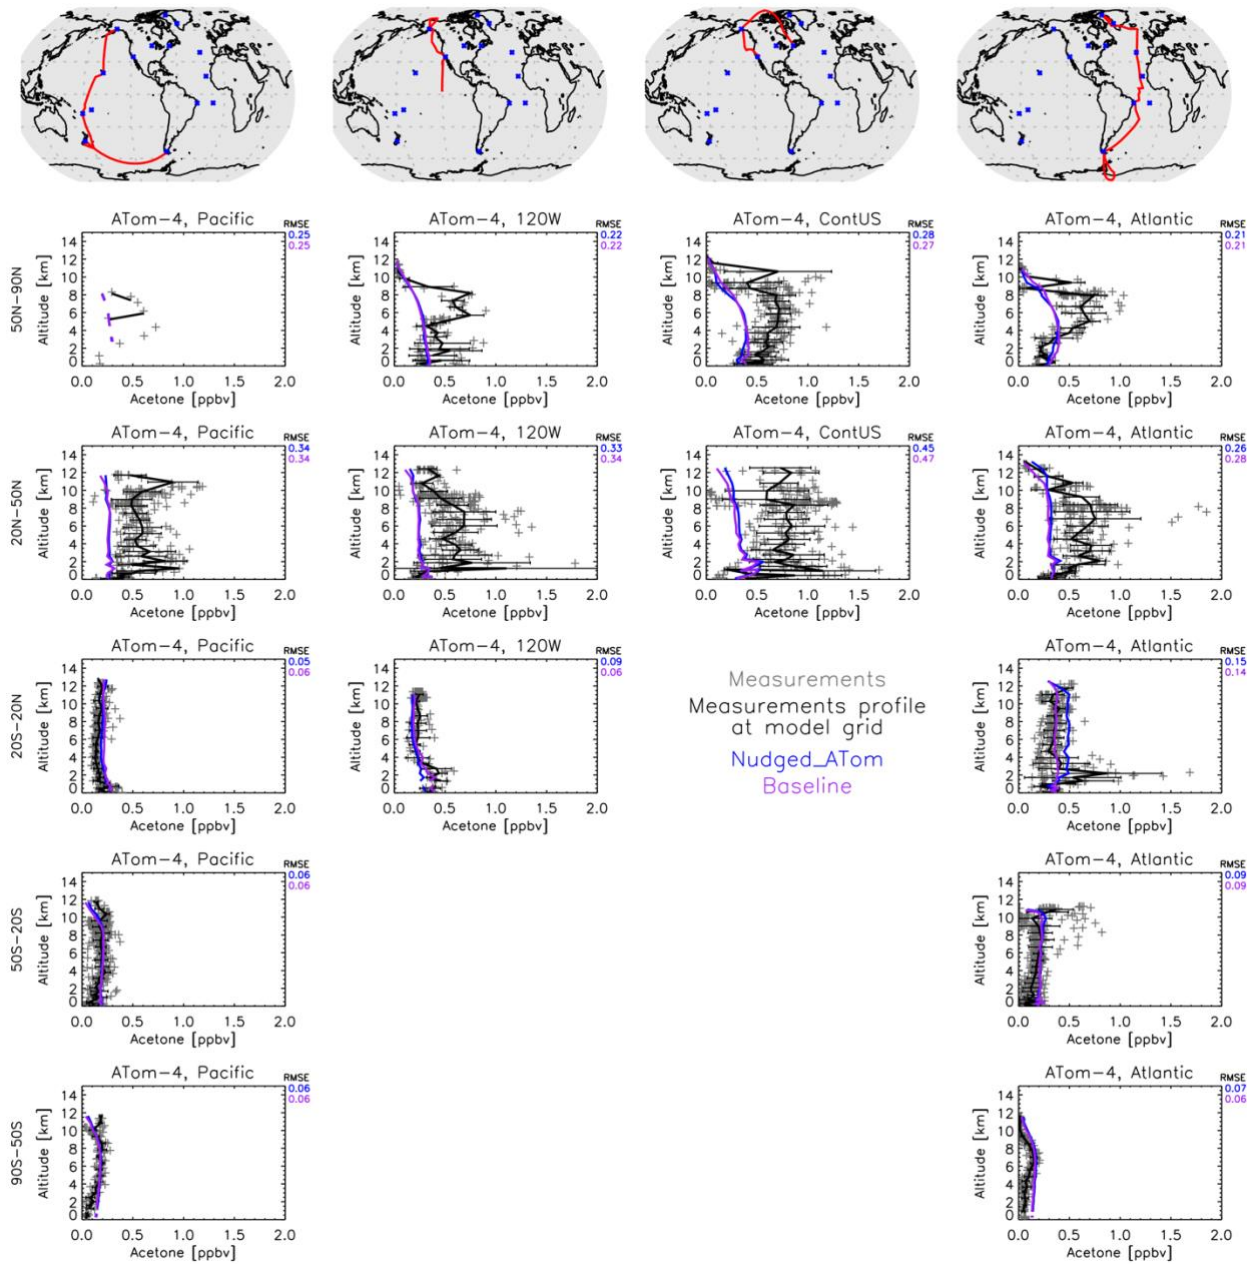

34

35 **Figure S5.** Similar to Figure S3, except for the ATom-4 field measurements (April-May 2018).

36

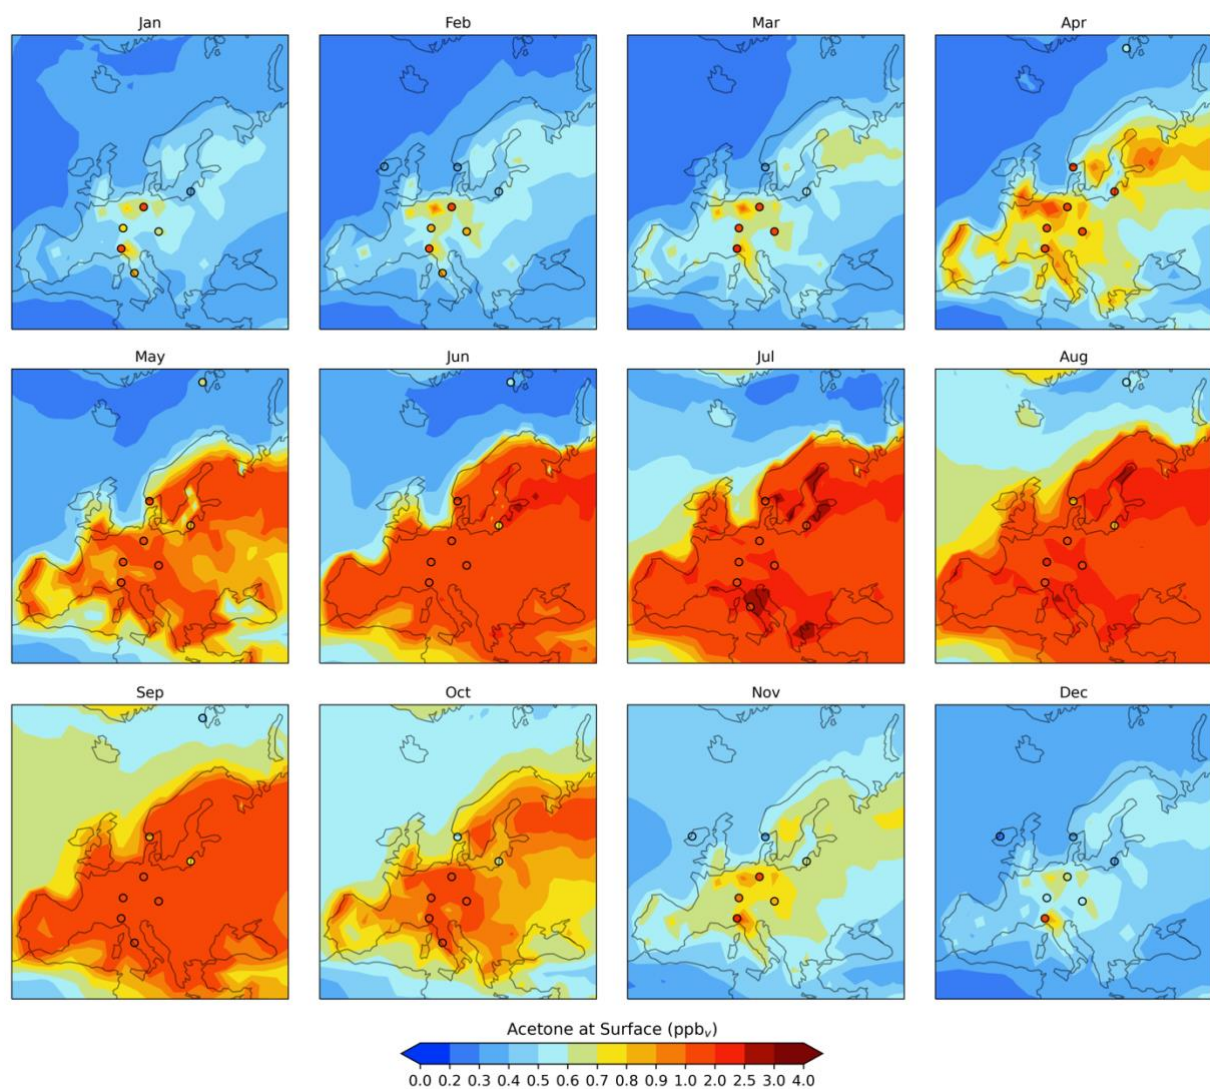

38

39 **Figure S6.** GISS ModelE2.1 spatial distribution of annual mean acetone at surface for the Baseline simulation in Europe over  
40 twelve months. Filled circles represent data from field measurements from Solberg et al. (1996). A nonlinear colorbar is used to  
41 better differentiate the details in the map.

42

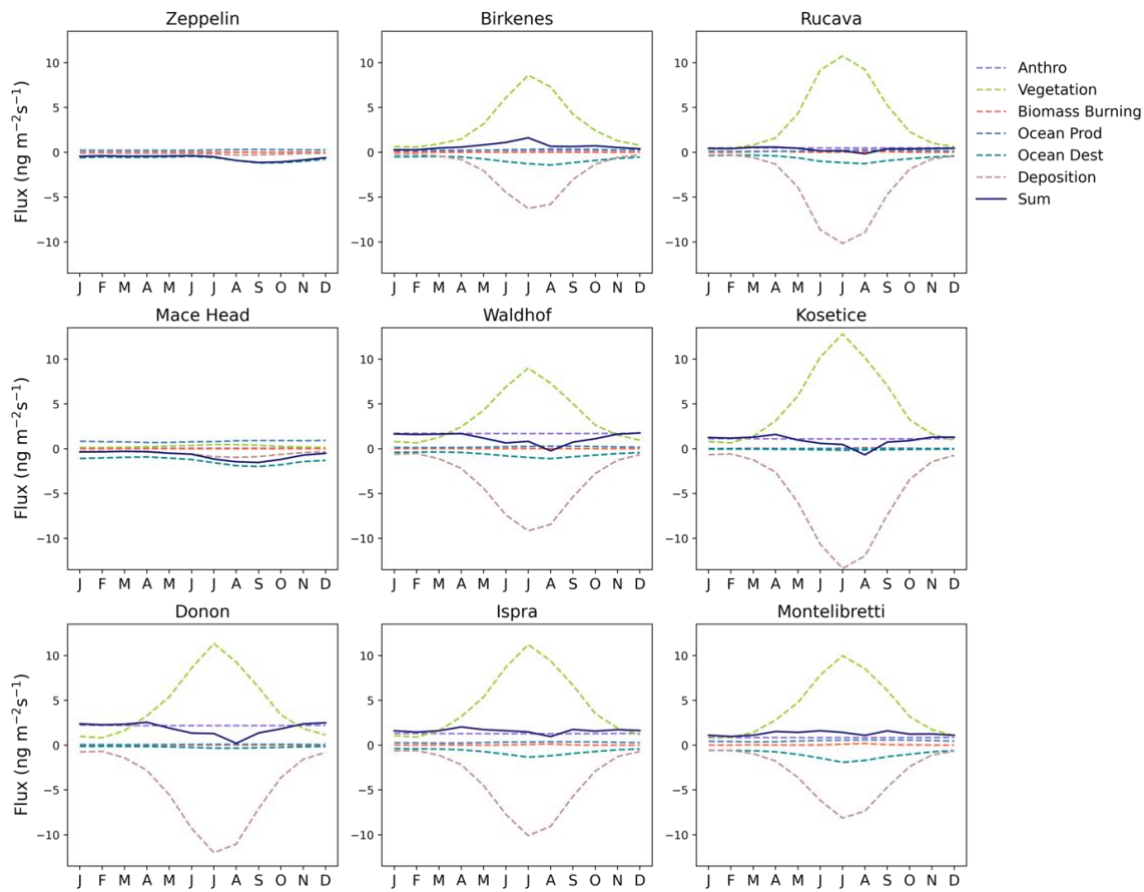

43

44 **Figure S7.** Contribution of acetone sources and sinks in the Baseline simulation over twelve months on the regional level ( $10^\circ \times$   
 45  $12.5^\circ$  grid boxes) at nine European sites. The sources and sinks are shown as various colored dashed lines, and their sums are  
 46 shown as solid navy-blue lines.

47

48



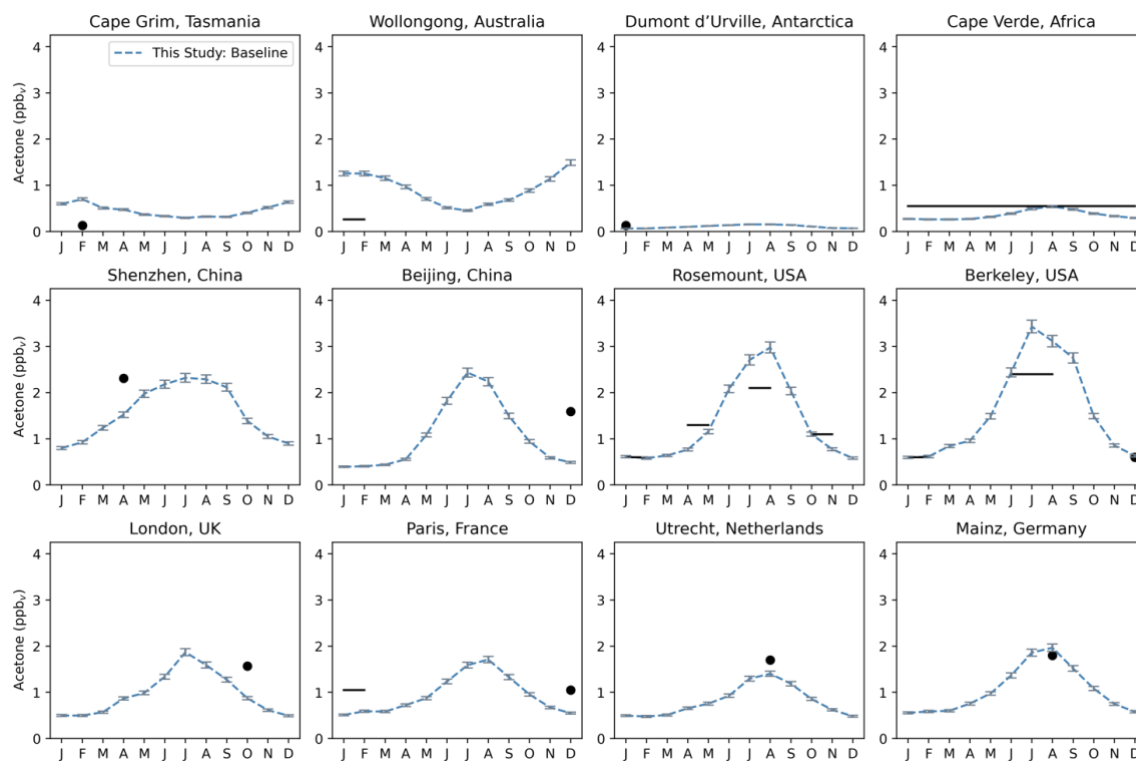

49  
 50 **Figure S8.** Acetone over twelve months for various sites that do not have enough measurements to resolve seasonality  
 51 (Australia, Antarctica, Africa, Asia, Europe, North America). The modeled estimates of acetone at the surface from the Baseline  
 52 simulation are shown as dashed blue lines and the grey error bars represent the one-sigma range of the modeled concentrations in  
 53 the climatological mean of 5 years. The modeled estimates are overlaid with monthly (solid circles) or seasonal (solid lines) field  
 54 measurements, as found in the literature (de Gouw et al., 2004; Dolgorouky et al., 2012; Galbally et al., 2007; Guérette et al.,  
 55 2019; Hu et al., 2013; Huang et al., 2020; Langford et al., 2010; Legrand et al., 2012; Li et al., 2019; Read et al., 2012; Schade  
 56 and Goldstein, 2006).

57  
 58  
 59  
 60  
 61

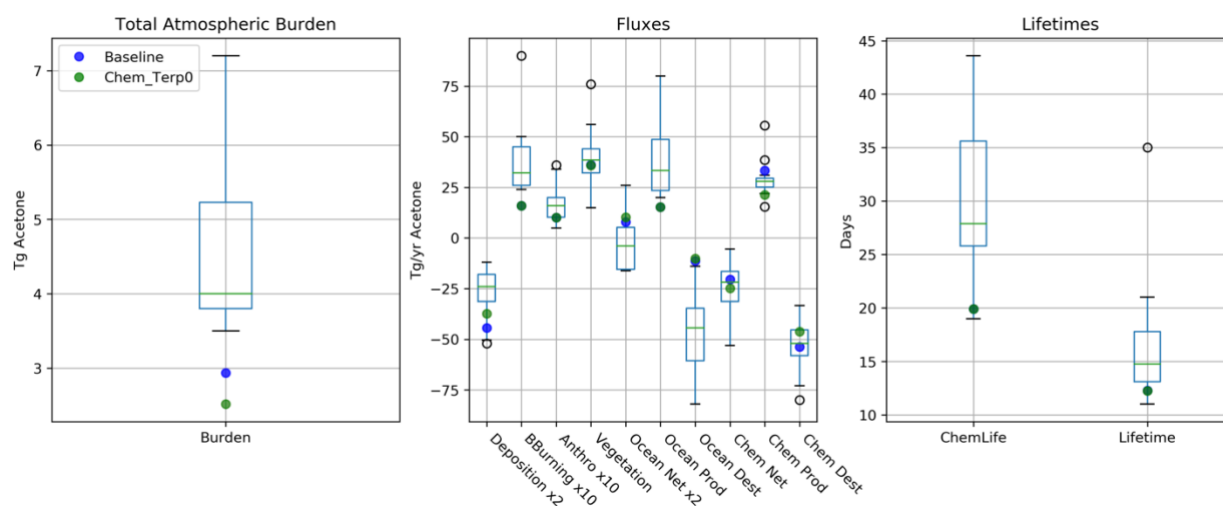

63  
64 **Figure S9.** Total atmospheric burden, fluxes, and lifetimes of acetone from the literature (shown in boxes and whiskers with  
65 outliers as open circles) (Arnold et al., 2005; Beale et al., 2013; Brewer et al., 2017; Dufour et al., 2016; Elias et al., 2011;  
66 Fischer et al., 2012; Folberth et al., 2006; Guenther et al., 2012; Jacob et al., 2002; Khan et al., 2015; Marandino et al., 2006;  
67 Singh et al., 2000, 2004; Wang et al., 2020), values from GISS ModelE2.1 Baseline simulation (solid blue circles), and values  
68 from the Chem\_Terp0 sensitivity study (green circles).

69

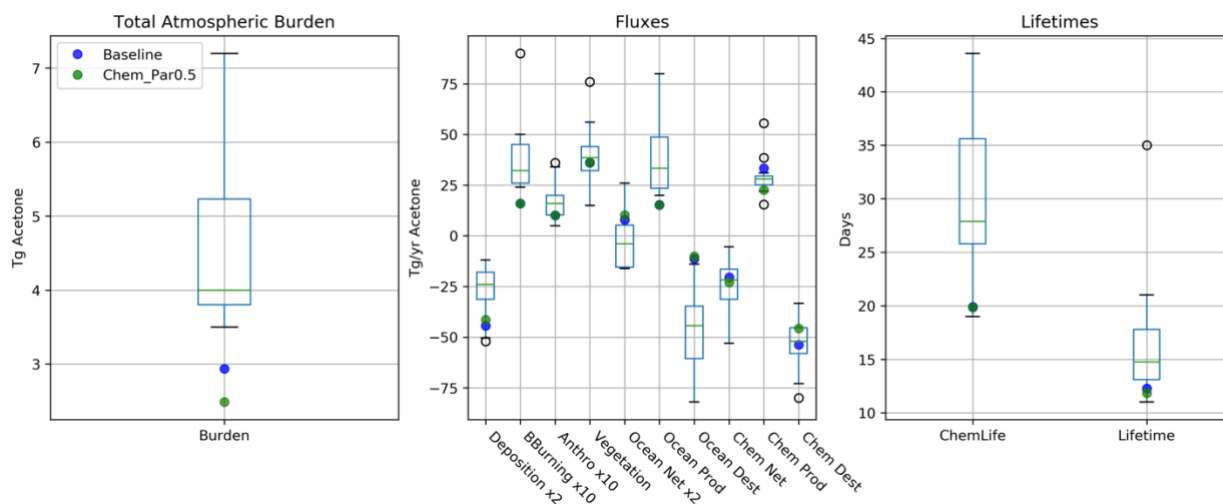

70  
71 **Figure S10.** Similar to Figure S9, except values from the Chem\_Par0.5 sensitivity study as green circles.

72

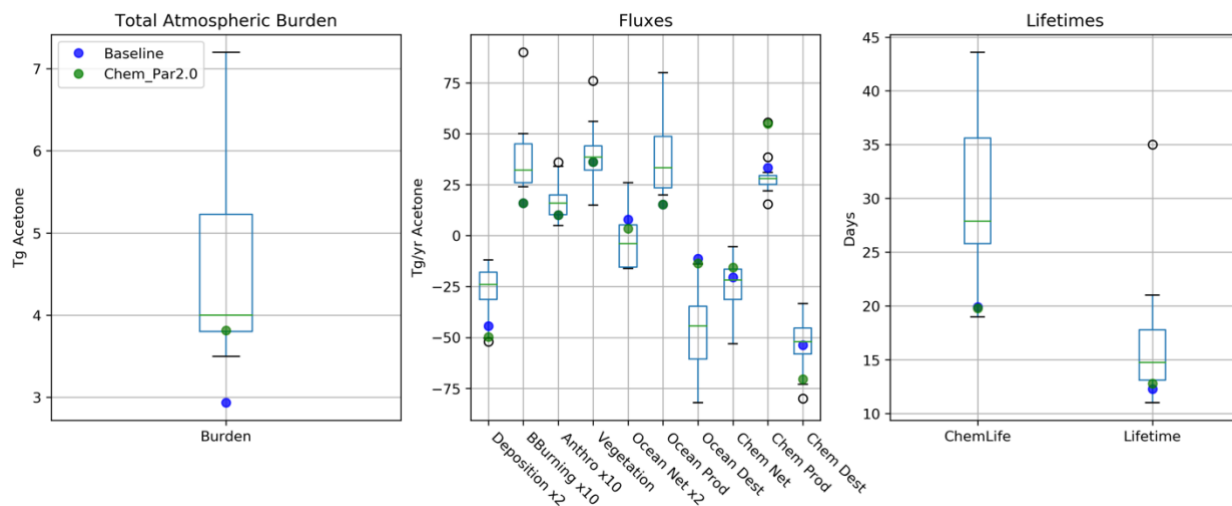

73  
 74 **Figure S11.** Similar to Figure S9, except values from the Chem\_Par2.0 sensitivity study as green circles.  
 75

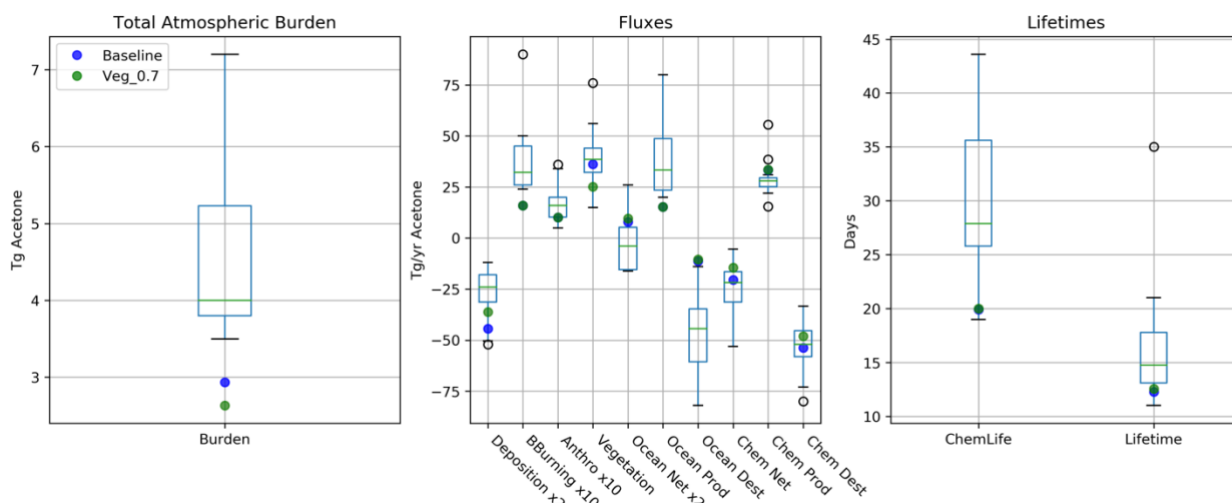

76  
 77 **Figure S12.** Similar to Figure S9, except values from the Veg\_0.7 sensitivity study as green circles.  
 78

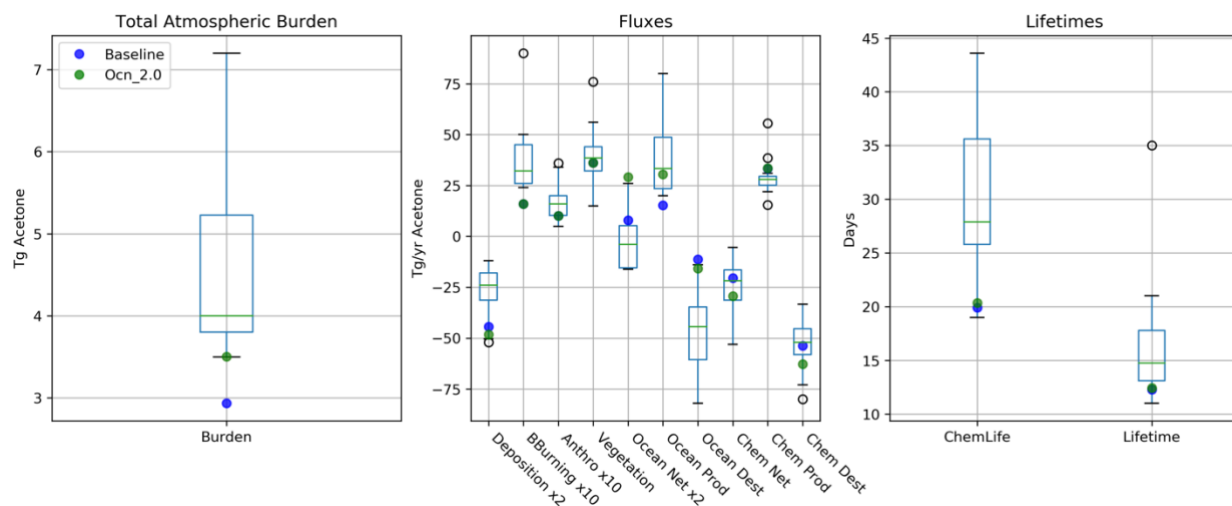

79  
 80 **Figure S13.** Similar to Figure S9, except values from the Ocn\_2.0 sensitivity study as green circles.

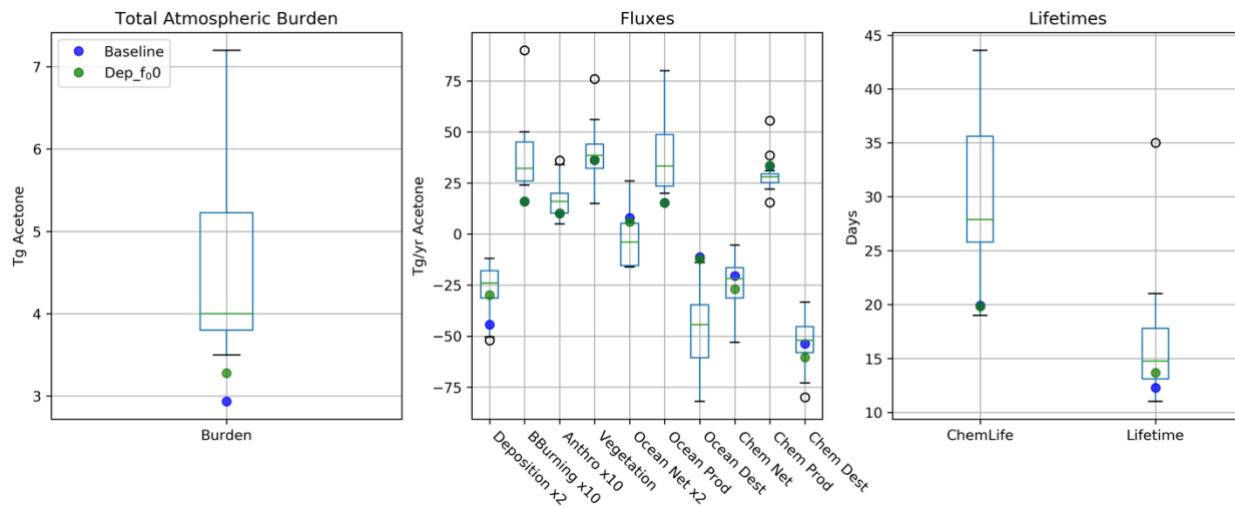

82

83 **Figure S14.** Similar to Figure S9, except values from the Dep\_f0 sensitivity study as green circles.

84

85

86

87

88

89

90

91

92

93

94

95

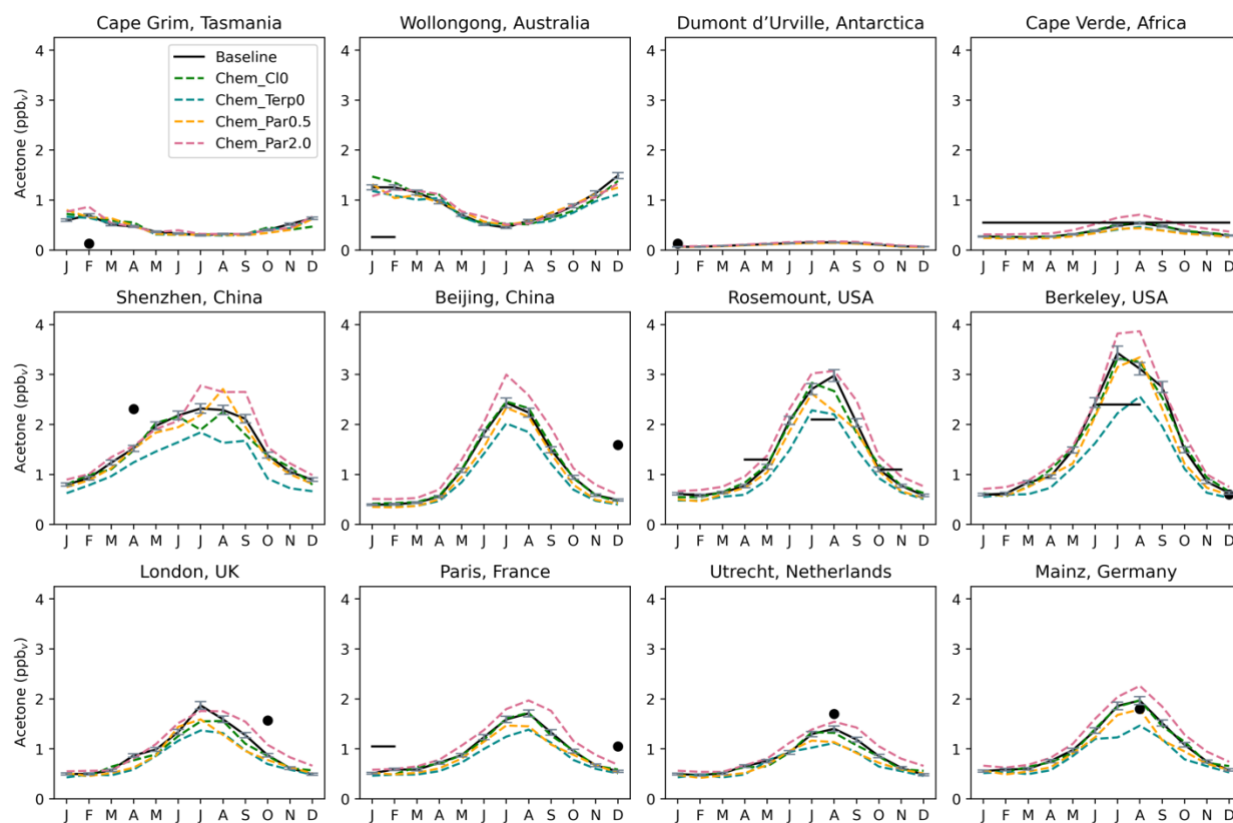

97

98 **Figure S15.** Similar to Figure S8, but with the chemistry sensitivity studies added. The modeled estimates of acetone at the  
 99 surface from the Baseline simulation are shown as solid black lines, and the sensitivity studies are as follows: removing the  
 100 acetone + chlorine reaction (dashed green lines), removing the production of acetone from terpenes (dashed blue lines), halving  
 101 the yield of acetone from paraffin (dashed orange lines), and doubling the yield of acetone from paraffin (dashed pink lines). The  
 102 modeled estimates are overlaid with monthly (solid circles) or seasonal (solid lines) field measurements, as found in the literature  
 103 (de Gouw et al., 2004; Dolgorouky et al., 2012; Galbally et al., 2007; Guérette et al., 2019; Hu et al., 2013; Huang et al., 2020;  
 104 Langford et al., 2010; Legrand et al., 2012; Li et al., 2019; Read et al., 2012; Schade and Goldstein, 2006).

105

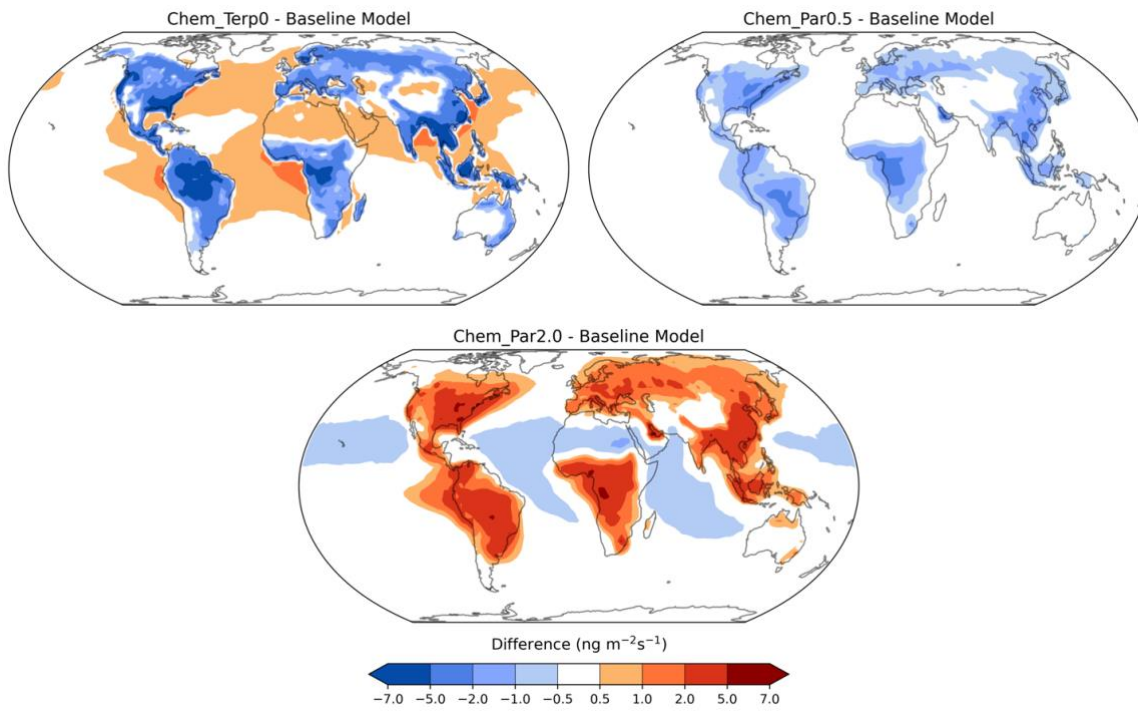

106

107

108

109

110

111

112

**Figure S16.** Chemistry sensitivities anomalies from Baseline, with red indicating an increase and blue indicating a decrease of the column-integrated net acetone chemistry flux. Nonlinear colorbars are used to better differentiate the details in the map. The fourth chemistry sensitivity study, Chem\_ClO, is omitted as the anomalies from Baseline are negligible.

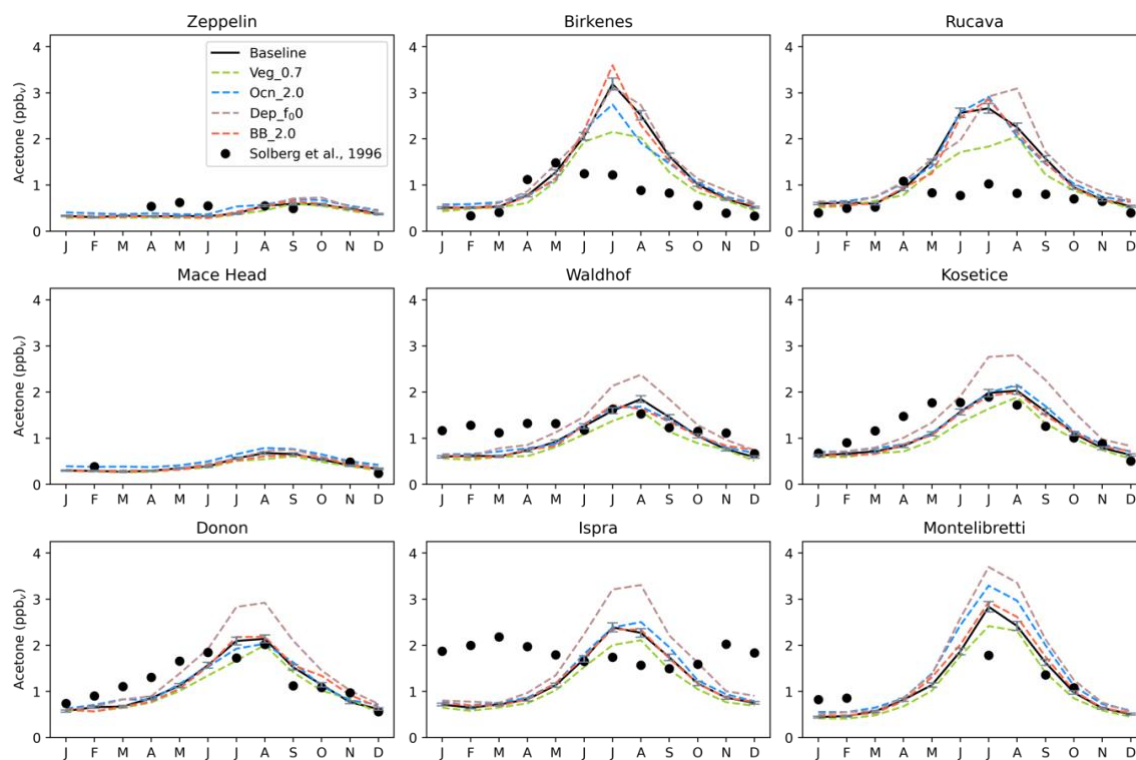

114  
 115 **Figure S17.** Acetone over twelve months at nine European sites with the terrestrial and oceanic sensitivity studies added. The  
 116 modeled estimates of acetone at the surface from the Baseline simulation are shown as solid black lines, and the sensitivity  
 117 studies are as follows: reducing vegetation emissions to 0.7 acetone from MEGAN (dashed light-green line), doubling ocean  
 118 acetone concentration (dashed blue line), changing the reactivity factor for dry deposition (dashed brown line), and doubling  
 119 biomass burning emissions (dashed orange line). Field measurements from Solberg et al., (1996) are shown as solid black dots.

120

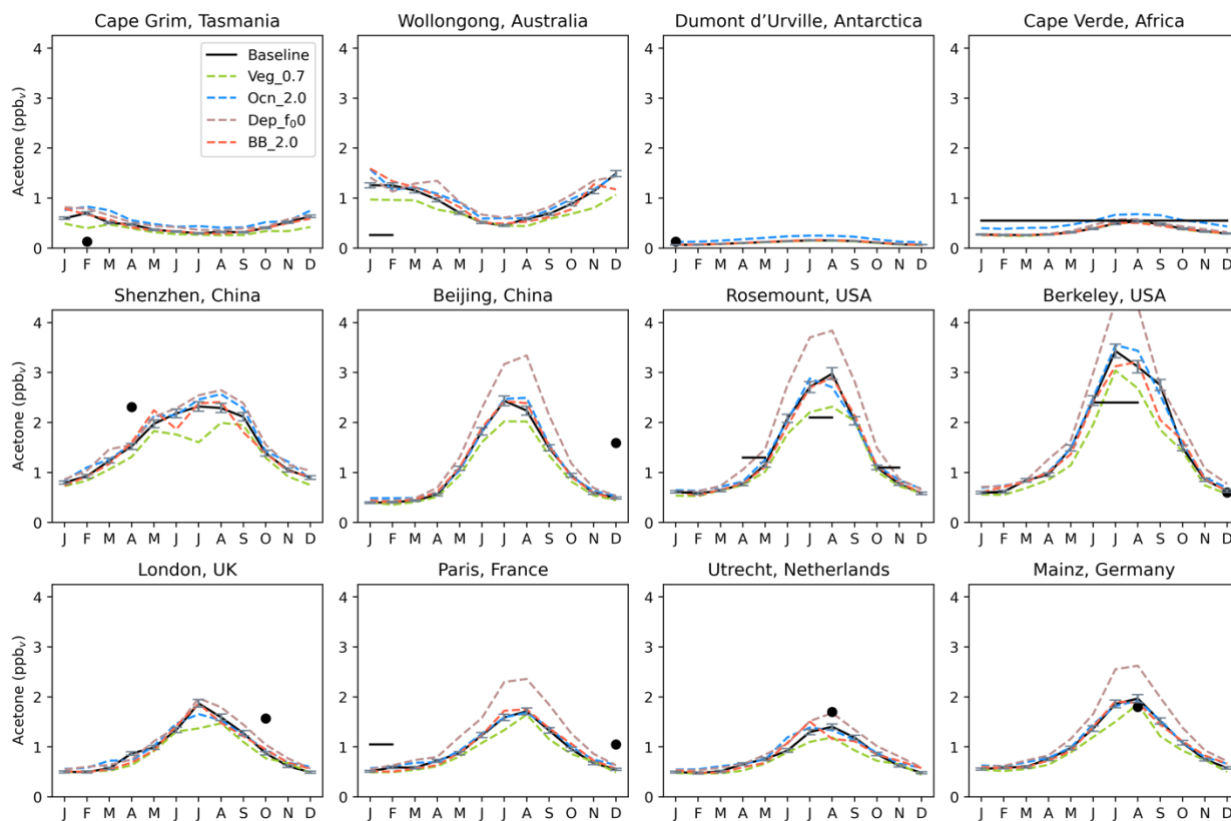

121

122 **Figure S18.** Similar to Figure S8, but with the terrestrial and oceanic sensitivity studies added. The modeled estimates of acetone  
 123 at the surface from the Baseline simulation are shown as solid black lines, and the sensitivity studies are as follows: reducing  
 124 vegetation emissions to 0.7 acetone from MEGAN (dashed light-green line), doubling ocean acetone concentration (dashed blue  
 125 line), changing the reactivity factor for dry deposition (dashed brown line), and doubling biomass burning emissions (dashed  
 126 orange line). Field measurements from Solberg et al., (1996) are shown as solid black dots. The modeled estimates are overlaid  
 127 with monthly (solid circles) or seasonal (solid lines) field measurements, as found in the literature (de Gouw et al., 2004;  
 128 Dolgorouky et al., 2012; Galbally et al., 2007; Guérette et al., 2019; Hu et al., 2013; Huang et al., 2020; Langford et al., 2010;  
 129 Legrand et al., 2012; Li et al., 2019; Read et al., 2012; Schade and Goldstein, 2006).



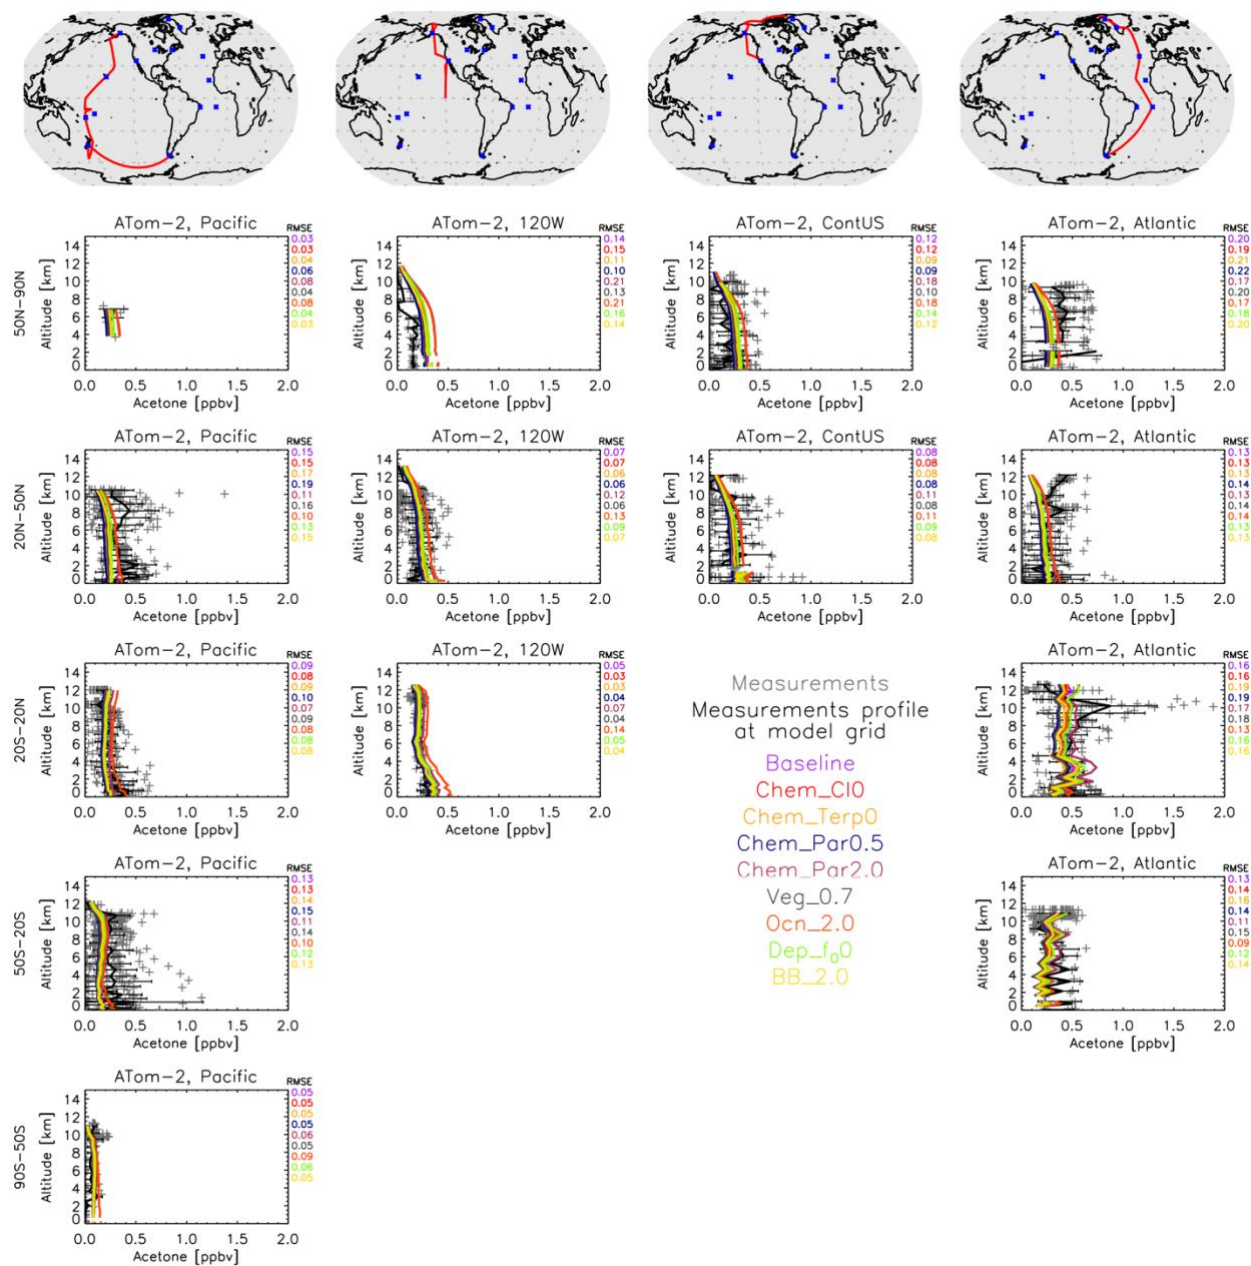

131

132 **Figure S19.** Similar to Figure S3, except a comparison between the GISS ModelE2.1 sensitivity simulations and the ATom-2  
 133 aircraft measurements (January-February 2017). Individual data points are shown with dark grey symbols, and their average  
 134 values are shown in black, with error bars representing the one-sigma range of the averages. The root mean square error (RMSE)  
 135 of each simulation is noted at the top right of each subplot. Note that all sensitivities are to be compared against the Baseline  
 136 simulation.

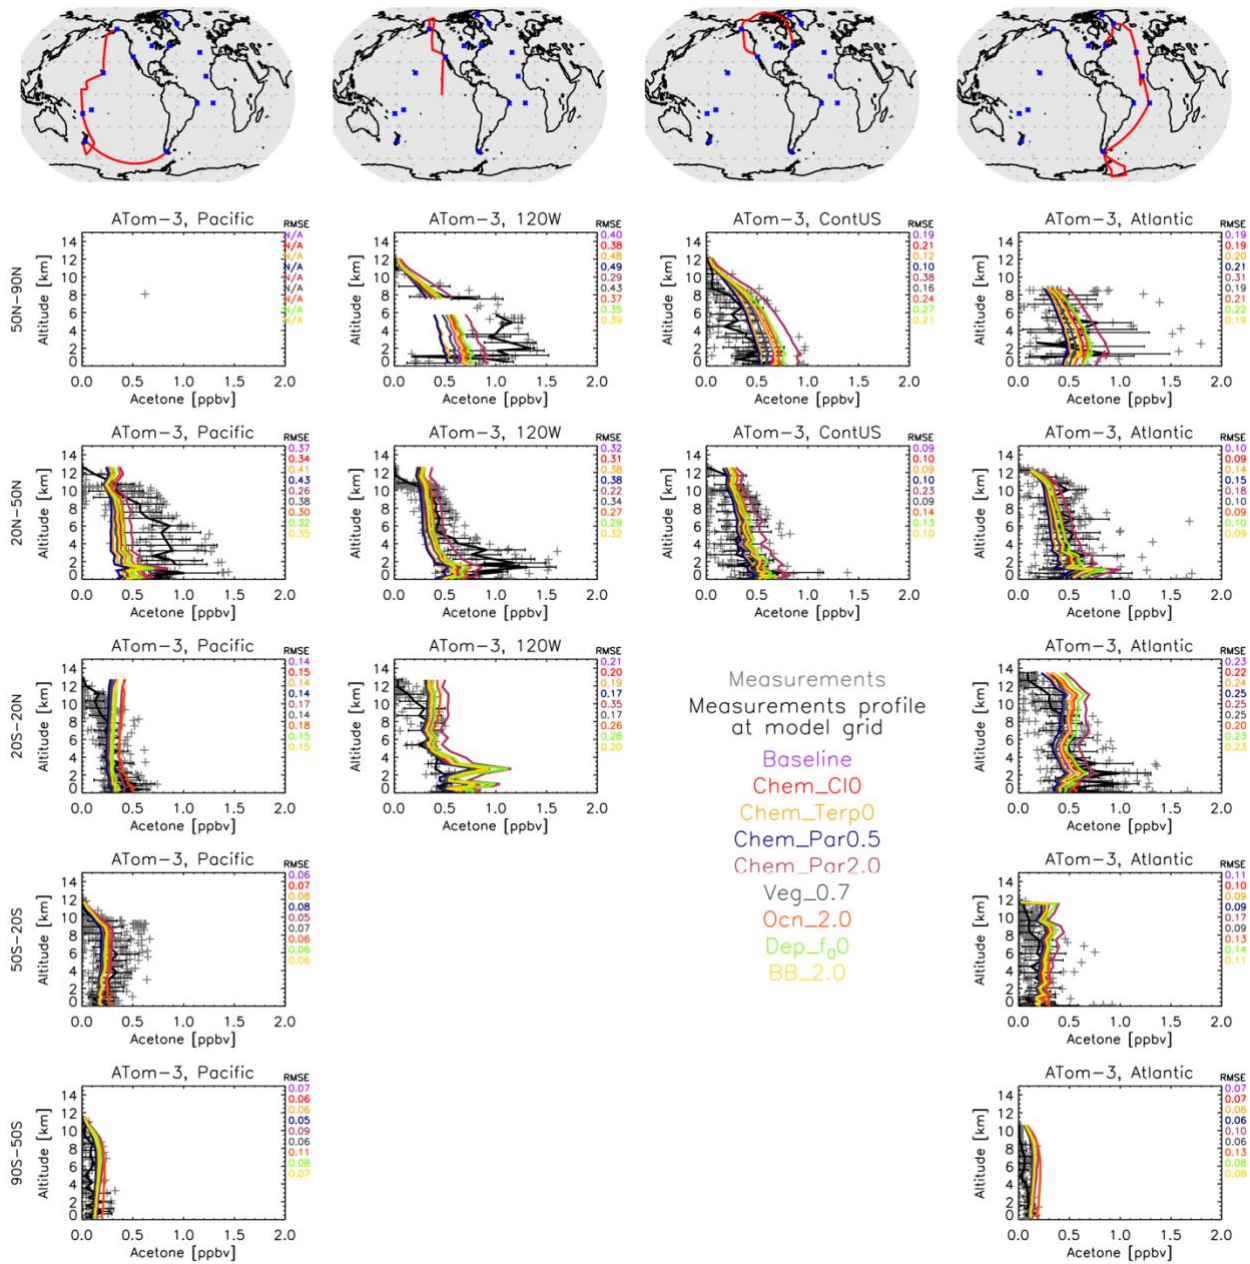

137

138 **Figure S20.** Similar to Figure S19, except for the ATom-3 field measurements (September-October 2017).

139

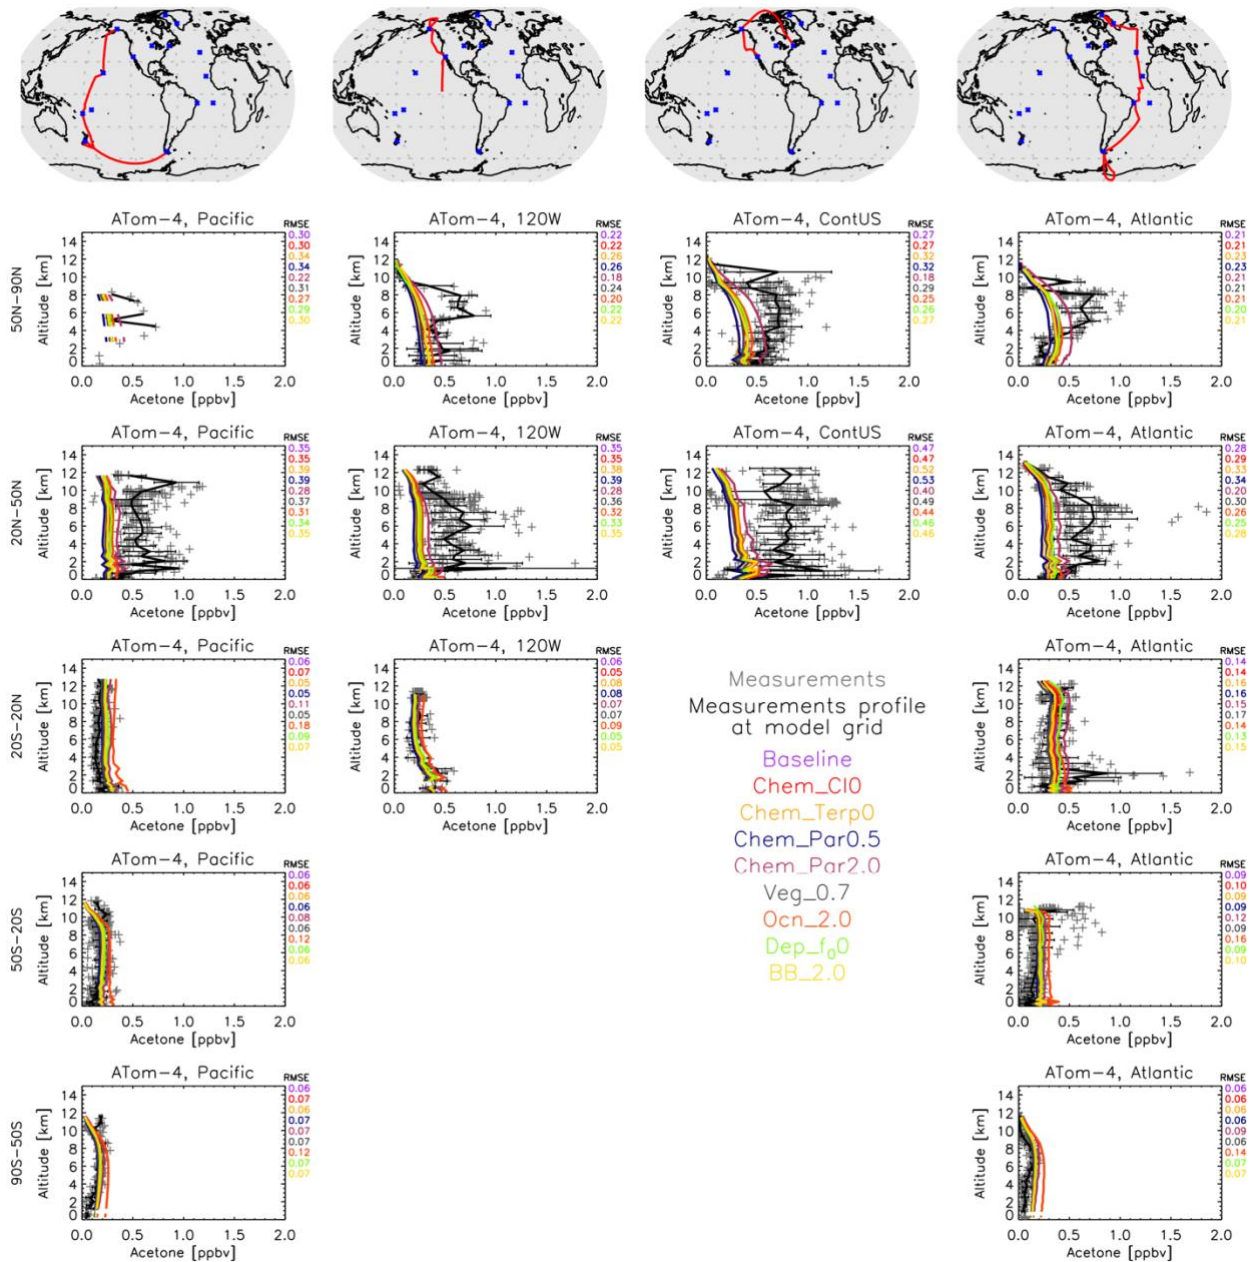

140

141 **Figure S21.** Similar to Figure S19, except for the ATom-4 field measurements (April-May 2018).

142 **References**

143 Arnold, S. R., Chipperfield, M. P., and Blitz, M. A.: A three-dimensional model study of the effect of new temperature-  
 144 dependent quantum yields for acetone photolysis, *J. Geophys. Res. Atmospheres*, 110, <https://doi.org/10.1029/2005JD005998>,  
 145 2005.

146 Beale, R., Dixon, J. L., Arnold, S. R., Liss, P. S., and Nightingale, P. D.: Methanol, acetaldehyde, and acetone in the surface  
 147 waters of the Atlantic Ocean, *J. Geophys. Res. Oceans*, 118, 5412–5425, <https://doi.org/10.1002/jgrc.20322>, 2013.

148 Brewer, J. F., Bishop, M., Kelp, M., Keller, C. A., Ravishankara, A. R., and Fischer, E. V.: A sensitivity analysis of key natural  
 149 factors in the modeled global acetone budget, *J. Geophys. Res. Atmospheres*, 122, 2043–2058,  
 150 <https://doi.org/10.1002/2016JD025935>, 2017.

151 Dolgorouky, C., Gros, V., Sarda-Esteve, R., Sinha, V., Williams, J., Marchand, N., Sauvage, S., Poulain, L., Sciare, J., and  
152 Bonsang, B.: Total OH reactivity measurements in Paris during the 2010 MEGAPOLI winter campaign, *Atmospheric Chem.*  
153 *Phys.*, 12, 9593–9612, <https://doi.org/10.5194/acp-12-9593-2012>, 2012.

154 Dufour, G., Szopa, S., Harrison, J. J., Boone, C. D., and Bernath, P. F.: Seasonal variations of acetone in the upper troposphere–  
155 lower stratosphere of the northern midlatitudes as observed by ACE-FTS, *J. Mol. Spectrosc.*, 323, 67–77,  
156 <https://doi.org/10.1016/j.jms.2016.02.006>, 2016.

157 Elias, T., Szopa, S., Zahn, A., Schuck, T., Brenninkmeijer, C., Sprung, D., and Slemr, F.: Acetone variability in the upper  
158 troposphere: analysis of CARIBIC observations and LMDz-INCA chemistry-climate model simulations, *Atmospheric Chem.*  
159 *Phys.*, 11, 8053–8074, <https://doi.org/10.5194/acp-11-8053-2011>, 2011.

160 Fischbeck, G., Bönisch, H., Neumaier, M., Brenninkmeijer, C. A. M., Orphal, J., Brito, J., Becker, J., Sprung, D., van Velthoven,  
161 P. F. J., and Zahn, A.: Acetone–CO enhancement ratios in the upper troposphere based on 7 years of CARIBIC data: new  
162 insights and estimates of regional acetone fluxes, *Atmospheric Chem. Phys.*, 17, 1985–2008, <https://doi.org/10.5194/acp-17-1985-2017>, 2017.

164 Fischer, E. V., Jacob, D. J., Millet, D. B., Yantosca, R. M., and Mao, J.: The role of the ocean in the global atmospheric budget  
165 of acetone, *Geophys. Res. Lett.*, 39, <https://doi.org/10.1029/2011GL050086>, 2012.

166 Folberth, G. A., Hauglustaine, D. A., Lathière, J., and Brocheton, F.: Interactive chemistry in the Laboratoire de Météorologie  
167 Dynamique general circulation model: model description and impact analysis of biogenic hydrocarbons on tropospheric  
168 chemistry, *Atmospheric Chem. Phys.*, 6, 2273–2319, <https://doi.org/10.5194/acp-6-2273-2006>, 2006.

169 Galbally, I., Lawson, S. J., Bentley, S., Gillett, R., Meyer, M., and Goldstein, A.: Volatile organic compounds in marine air at  
170 Cape Grim, Australia, *Environ. Chem. - Env. CHEM*, 4, <https://doi.org/10.1071/EN07024>, 2007.

171 de Gouw, J., Warneke, C., Holzinger, R., Klüpfel, T., and Williams, J.: Inter-comparison between airborne measurements of  
172 methanol, acetonitrile and acetone using two differently configured PTR-MS instruments, *Int. J. Mass Spectrom.*, 239, 129–137,  
173 <https://doi.org/10.1016/j.ijms.2004.07.025>, 2004.

174 Guenther, A. B., Jiang, X., Heald, C. L., Sakulyanontvittaya, T., Duhl, T., Emmons, L. K., and Wang, X.: The Model of  
175 Emissions of Gases and Aerosols from Nature version 2.1 (MEGAN2.1): an extended and updated framework for modeling  
176 biogenic emissions, *Geosci. Model Dev.*, 5, 1471–1492, <https://doi.org/10.5194/gmd-5-1471-2012>, 2012.

177 Guérette, É.-A., Paton-Walsh, C., Galbally, I., Molloy, S., Lawson, S., Kubistin, D., Buchholz, R., Griffith, D. W. T.,  
178 Langenfelds, R. L., Krummel, P. B., Loh, Z., Chambers, S., Griffiths, A., Keywood, M., Selleck, P., Dominick, D., Humphries,  
179 R., and Wilson, S. R.: Composition of Clean Marine Air and Biogenic Influences on VOCs during the MUMBA Campaign,  
180 *Atmosphere*, 10, 383, <https://doi.org/10.3390/atmos10070383>, 2019.

181 Hu, L., Millet, D. B., Kim, S. Y., Wells, K. C., Griffis, T. J., Fischer, E. V., Helmig, D., Hueber, J., and Curtis, A. J.: North  
182 American acetone sources determined from tall tower measurements and inverse modeling, *Atmospheric Chem. Phys.*, 13, 3379–  
183 3392, <https://doi.org/10.5194/acp-13-3379-2013>, 2013.

184 Huang, X.-F., Zhang, B., Xia, S.-Y., Han, Y., Wang, C., Yu, G.-H., and Feng, N.: Sources of oxygenated volatile organic  
185 compounds (OVOCs) in urban atmospheres in North and South China, *Environ. Pollut.*, 261, 114152,  
186 <https://doi.org/10.1016/j.envpol.2020.114152>, 2020.

187 Jacob, D. J., Field, B. D., Jin, E. M., Bey, I., Li, Q., Logan, J. A., Yantosca, R. M., and Singh, H. B.: Atmospheric budget of  
188 acetone, *J. Geophys. Res. Atmospheres*, 107, ACH 5-1-ACH 5-17, <https://doi.org/10.1029/2001JD000694>, 2002.

189 Khan, M. A. H., Cooke, M. C., Utembe, S. R., Archibald, A. T., Maxwell, P., Morris, W. C., Xiao, P., Derwent, R. G., Jenkin,  
190 M. E., Percival, C. J., Walsh, R. C., Young, T. D. S., Simmonds, P. G., Nickless, G., O'Doherty, S., and Shallcross, D. E.: A  
191 study of global atmospheric budget and distribution of acetone using global atmospheric model STOCHEM-CRI, *Atmos.*  
192 *Environ.*, 112, 269–277, <https://doi.org/10.1016/j.atmosenv.2015.04.056>, 2015.

193 Langford, B., Nemitz, E., House, E., Phillips, G. J., Famulari, D., Davison, B., Hopkins, J. R., Lewis, A. C., and Hewitt, C. N.:  
194 Fluxes and concentrations of volatile organic compounds above central London, UK, *Atmospheric Chem. Phys.*, 10, 627–645,  
195 <https://doi.org/10.5194/acp-10-627-2010>, 2010.

- 196 Legrand, M., Gros, V., Preunkert, S., Sarda-Estève, R., Thierry, A.-M., Pépy, G., and Jourdain, B.: A reassessment of the budget  
197 of formic and acetic acids in the boundary layer at Dumont d'Urville (coastal Antarctica): The role of penguin emissions on the  
198 budget of several oxygenated volatile organic compounds, *J. Geophys. Res. Atmospheres*, 117,  
199 <https://doi.org/10.1029/2011JD017102>, 2012.
- 200 Li, K., Li, J., Tong, S., Wang, W., Huang, R.-J., and Ge, M.: Characteristics of wintertime VOCs in suburban and urban Beijing:  
201 concentrations, emission ratios, and festival effects, *Atmospheric Chem. Phys.*, 19, 8021–8036, [https://doi.org/10.5194/acp-19-](https://doi.org/10.5194/acp-19-8021-2019)  
202 8021-2019, 2019.
- 203 Marandino, C., Bruyn, W. J., Miller, S. D., Prather, M., and Saltzman, E.: Correction to ““Oceanic uptake and the global  
204 atmospheric acetone budget,”” <https://doi.org/10.1029/2006GL028225>, 2006.
- 205 Read, K. A., Carpenter, L. J., Arnold, S. R., Beale, R., Nightingale, P. D., Hopkins, J. R., Lewis, A. C., Lee, J. D., Mendes, L.,  
206 and Pickering, S. J.: Multiannual Observations of Acetone, Methanol, and Acetaldehyde in Remote Tropical Atlantic Air:  
207 Implications for Atmospheric OVOC Budgets and Oxidative Capacity, *Environ. Sci. Technol.*, 46, 11028–11039,  
208 <https://doi.org/10.1021/es302082p>, 2012.
- 209 Schade, G. W. and Goldstein, A. H.: Seasonal measurements of acetone and methanol: Abundances and implications for  
210 atmospheric budgets, *Glob. Biogeochem. Cycles*, 20, <https://doi.org/10.1029/2005GB002566>, 2006.
- 211 Singh, H., Chen, Y., Tabazadeh, A., Fukui, Y., Bey, I., Yantosca, R., Jacob, D., Arnold, F., Wohlfrom, K., Atlas, E., Flocke, F.,  
212 Blake, D., Blake, N., Heikes, B., Snow, J., Talbot, R., Gregory, G., Sachse, G., Vay, S., and Kondo, Y.: Distribution and fate of  
213 selected oxygenated organic species in the troposphere and lower stratosphere over the Atlantic, *J. Geophys. Res. Atmospheres*,  
214 105, 3795–3805, <https://doi.org/10.1029/1999JD900779>, 2000.
- 215 Singh, H. B., Salas, L. J., Chatfield, R. B., Czech, E., Fried, A., Walega, J., Evans, M. J., Field, B. D., Jacob, D. J., Blake, D.,  
216 Heikes, B., Talbot, R., Sachse, G., Crawford, J. H., Avery, M. A., Sandholm, S., and Fuelberg, H.: Analysis of the atmospheric  
217 distribution, sources, and sinks of oxygenated volatile organic chemicals based on measurements over the Pacific during  
218 TRACE-P, *J. Geophys. Res. Atmospheres*, 109, <https://doi.org/10.1029/2003JD003883>, 2004.
- 219 Solberg, S., Dye, C., Schmidbauer, N., Herzog, A., and Gehrig, R.: Carbonyls and nonmethane hydrocarbons at rural European  
220 sites from the mediterranean to the arctic, *J. Atmospheric Chem.*, 25, 33–66, <https://doi.org/10.1007/BF00053285>, 1996.
- 221 Wang, S., Apel, E. C., Schwantes, R. H., Bates, K. H., Jacob, D. J., Fischer, E. V., Hornbrook, R. S., Hills, A. J., Emmons, L. K.,  
222 Pan, L. L., Honomichl, S., Tilmes, S., Lamarque, J.-F., Yang, M., Marandino, C. A., Saltzman, E. S., Bruyn, W. de, Kameyama,  
223 S., Tanimoto, H., Omori, Y., Hall, S. R., Ullmann, K., Ryerson, T. B., Thompson, C. R., Peischl, J., Daube, B. C., Commane, R.,  
224 McKain, K., Sweeney, C., Thames, A. B., Miller, D. O., Brune, W. H., Diskin, G. S., DiGangi, J. P., and Wofsy, S. C.: Global  
225 Atmospheric Budget of Acetone: Air-Sea Exchange and the Contribution to Hydroxyl Radicals, *J. Geophys. Res. Atmospheres*,  
226 125, e2020JD032553, <https://doi.org/10.1029/2020JD032553>, 2020.
- 227 Weimer, M., Schröter, J., Eckstein, J., Deetz, K., Neumaier, M., Fischbeck, G., Hu, L., Millet, D. B., Rieger, D., Vogel, H.,  
228 Vogel, B., Reddmann, T., Kirner, O., Ruhnke, R., and Braesicke, P.: An emission module for ICON-ART 2.0: implementation  
229 and simulations of acetone, *Geosci. Model Dev.*, 10, 2471–2494, <https://doi.org/10.5194/gmd-10-2471-2017>, 2017.
